# Supplementary material for: Comparison of Mid-Term Prognosis in Intermediate-to-Low-Risk Contemporary Population with Guidelines-Oriented Age Cutoff
Source: MDPI journal article supplement (doi:10.3390/jcdd11010033), 2024-01-22
Supplement: s1 [file s1]

# **Supplementary Material**

**Comparison of Mid-Term Prognosis in Intermediate-to-Low-Risk Contemporary Population with Guide-lines-Oriented Age Cutoff.**

## **I. STUDY DEVICES**

## **II. PARTICIPATING CENTERS**

## **III. LIST OF COVARIATES USED FOR THE INVERSE PROBABILITY WEIGHTING ANALYSIS**

## **IV. SUPPLEMENTARY TABLES AND FIGURES**

## **I. STUDY DEVICES**

The Evolut R System (Medtronic, Inc., Minneapolis, Minnesota) comprises the Evolut R valve and the EnVeo R Delivery catheter system (DCS) with the InLine sheath. The porcine pericardial tissue trileaflet valve is sutured in a supra-annular position on a compressible and self-expandable nitinol frame. The EnVeo R DCS enables the valve to be fully repositionable and recapturable before full release. The built-in InLine sheath allows for the whole system to be inserted into a patient without the need for a separate access sheath, equivalent to the outer diameter of a 14-F sheath [1]. The Evolut R valve is currently available in 23, 26, 29 and 34 mm sizes. The Evolut PRO System (Medtronic, Inc., Minneapolis, Minnesota) is delivered transfemorally using a dedicated sheathless delivery system with an outer diameter of a 16-F sheath. The device has the same shape and properties as the second-generation Evolute R version, except for an outer adjunctive pericardial skirt to enhance annular sealing. The Evolute PRO valve is currently available in 23-, 26-, and 29-mm sizes.

The Acurate NEO bioprosthesis is composed of porcine pericardial valve leaflets mounted on a self-expanding nitinol frame in a supra-annular position, with a pericardial sealing skirt on the outer and inner surfaces of the stent body. The system is implanted using a dedicated transfemoral delivery system inserted through a 20-F sheath. At the top of the valve, there are three flexible and repositionable stabilization arches, ensuring coaxial alignment. The upper crown ensures stable positioning and anchoring of the native leaflets, which theoretically can reduce the risk of coronary obstruction and paravalvular leaks [2]. The device is currently available in sizes small, medium, and large.

## **II. PARTICIPATING CENTERS**

1. Interventional Cardiology Unit, Maria Cecilia Hospital, GCM Care and Research
2. Department of Cardiology, Cardiovascular Institute, Hospital Clínico San Carlos, Madrid, Spain
3. The Heart Center, Rigshospitalet, Copenhagen
4. Department of Cardiology and Cardiac Surgery, Kerckhoff Heart and Lung Center, Bad Nauheim, Germany
- 5. Department of Cardiovascular Surgery, University Heart Center, Hamburg, Germany**
6. Department of Cardiology, C.A.S.T. Policlinic G. Rodolico Hospital, University of Catania, Catania, Italy
7. Cardio Center, Humanitas Research Hospital, Rozzano-Milan, Italy
8. Division of Cardiology, Pulmonology, and Vascular Medicine, University Hospital Düsseldorf, Düsseldorf, Germany
- 9. Department of Cardiology, IRCCS Policlinico San Donato, Milan, Italy**
- 10. Heart Valve Clinic, University Hospital of Zürich, Zürich, Switzerland**

11. Quebec Heart Institute, Laval Hospital, Quebec, Canada

**12. Department of Cardiology, Hospital of León, León, Spain**

**13. Department of Cardiology, Galway University Hospitals, Galway, Ireland**

14. Clinic Cardiovascular Institute, University Hospital Clinic, IDIBAPS, Barcelona, Spain

15. "Evangelismos" Hospital, National and Kapodistrian University of Athens, Greece

16. Interventional Cardiology Unit, Ospedali Riuniti di Ancona, Italy

### ***III. LIST OF COVARIATES INCLUDED IN THE INVERSE PROBABILITY WEIGHTING ANALYSIS***

Age  
Diabetes  
Body mass index  
Hypertension  
Aortic regurgitation ☐ \_moderate  
Male  
NYHA III or IV functional class  
Aortic valve calcification ☐ \_moderate  
Left ventricle outflow tract calcification ☐ \_moderate  
Low gradient aortic stenosis  
Atrial fibrillation  
Chronic obstructive pulmonary artery disease  
Peripheral artery disease  
Porcelain aorta  
Previous cardiac surgery  
Previous myocardial infarction  
Previous percutaneous coronary interventions  
Previous pacemaker/defibrillators  
Previous stroke  
Ejection fraction  
Transcatheter prosthesis size  
Annulus perimeter size  
The Society of Thoracic Surgeons score

#### IV. SUPPLEMENTARY TABLES AND FIGURES

**Supplementary Table S1. In-hospital outcomes according to age quartiles**

| <b>Outcome</b>         | <b>I quartile<br/>(N=679)</b> | <b>II quartile<br/>(N=559)</b> | <b>III quartile<br/>(N=799)</b> | <b>IV quartile<br/>(N=648)</b> | <b>P value</b> |
|------------------------|-------------------------------|--------------------------------|---------------------------------|--------------------------------|----------------|
| Procedural death       | 3 (0.4)                       | 2 (0.4)                        | 6 (0.8)                         | 5 (0.8)                        | 0.726          |
| Vascular complications |                               |                                |                                 |                                |                |
| Major                  | 38 (5.6)                      | 34 (6.1)                       | 57 (7.1)                        | 44 (6.8)                       | 0.638          |
| Minor                  | 65 (9.6)                      | 55 (9.8)                       | 76 (9.5)                        | 58 (9.0)                       | 0.963          |
| Anulus rupture         | 1 (0.1)                       | 1 (0.2)                        | 3 (0.4)                         | 2 (0.3)                        | 0.848          |
| New permanent PM       | 64 (9.4)                      | 56 (10)                        | 106 (13.3)                      | 86 (13.3)                      | 0.036          |
| Myocardial infarction  | 4 (0.6)                       | 2 (0.4)                        | 2 (0.3)                         | 3 (0.5)                        | 0.787          |
| Tamponade              | 3 (0.4)                       | 6 (1.1)                        | 15 (1.9)                        | 5 (0.8)                        | 0.069          |
| Stroke                 | 12 (1.8)                      | 12 (2.1)                       | 20 (2.5)                        | 13 (2.0)                       | 0.815          |
| Bleeding               |                               |                                |                                 |                                |                |
| Major                  | 23 (3.4)                      | 20 (3.6)                       | 37 (4.6)                        | 28 (4.3)                       | 0.525          |
| Minor                  | 72 (10.6)                     | 54 (9.7)                       | 70 (8.8)                        | 57 (8.9)                       | 0.547          |
| AKI                    | 32 (4.7)                      | 28 (5.0)                       | 55 (6.9)                        | 34 (5.2)                       | 0.677          |

Supplementary Figure S1. All-cause mortality according to age quartiles

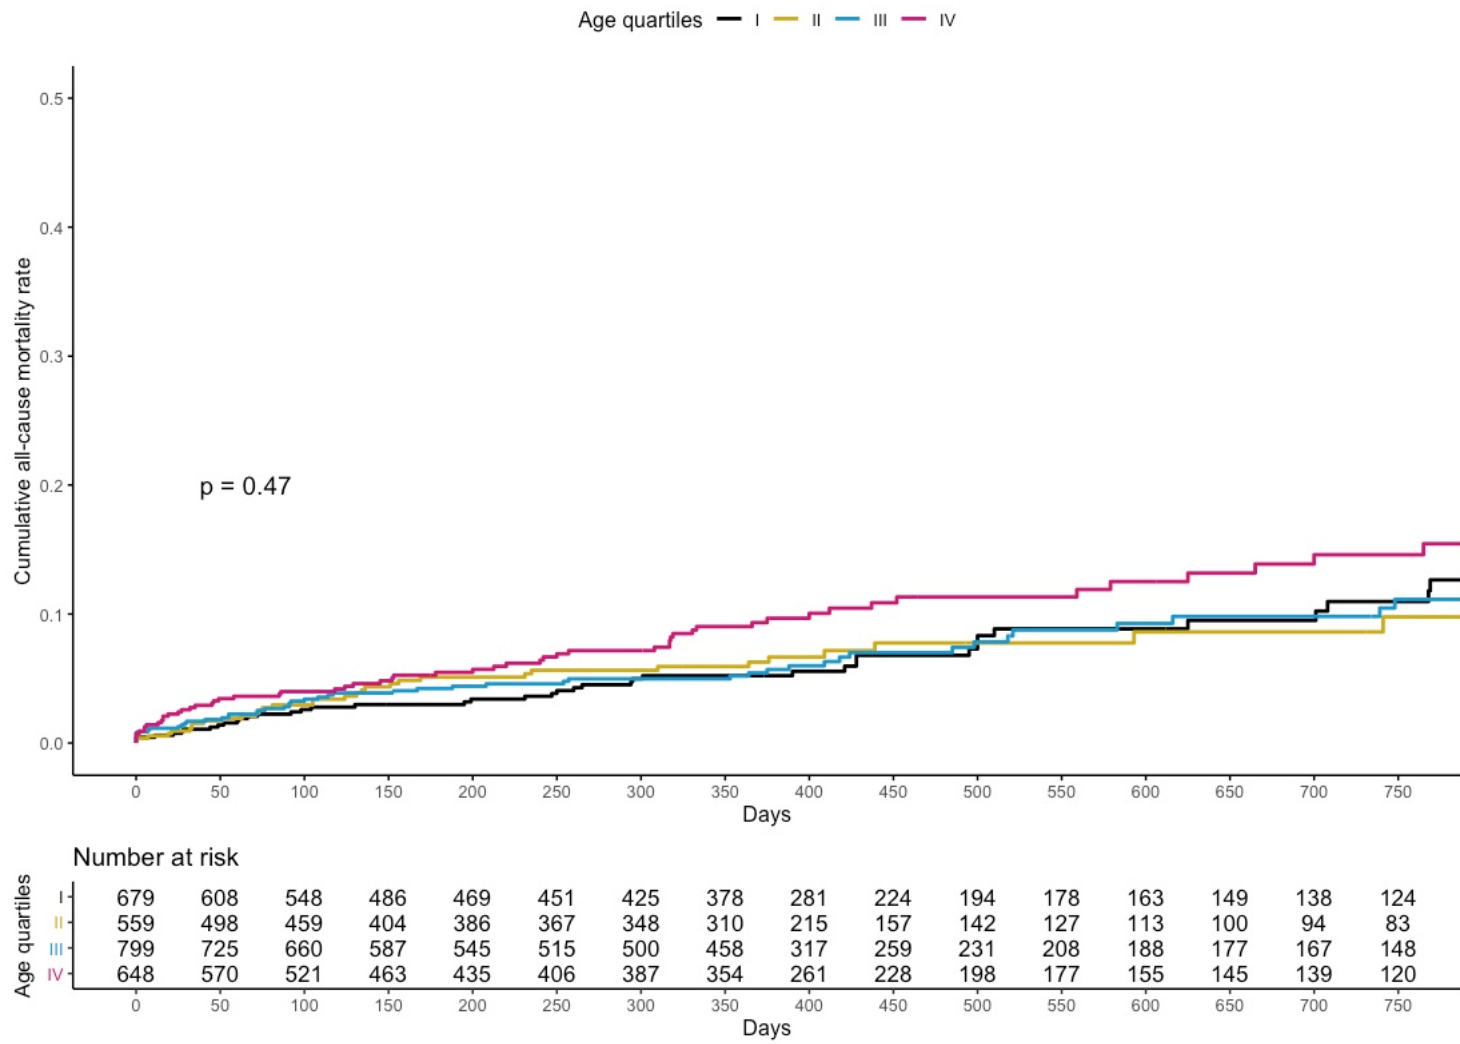



Table S2. Predictors of mortality, including age as a factor, beyond its non-significance at the univariate analysis.

| Variable                                     | Univariable      |                  | Multivariable    |              |
|----------------------------------------------|------------------|------------------|------------------|--------------|
|                                              | HR (95% CI)      | p-value          | HR (95% CI)      | p-value      |
| Age (1-year increase)                        | 1.01 (0.99-1.04) | 0.294            | 1.00 (0.97-1.01) | 0.428        |
| Male sex                                     | 1.14 (0.87-1.50) | 0.336            |                  |              |
| Prior MI                                     | 1.19 (0.84-1.68) | 0.323            |                  |              |
| Diabetes                                     | 1.05 (0.78-1.42) | 0.746            |                  |              |
| NYHA III-IV                                  | 1.92 (1.40-2.63) | <b>&lt;0.001</b> | 1.65 (1.21-2.29) | <b>0.001</b> |
| COPD                                         | 1.12 (0.80-1.56) | 0.502            |                  |              |
| Prior stroke                                 | 1.02 (0.67-1.57) | 0.928            |                  |              |
| PAD                                          | 1.37 (0.96-.95)  | 0.082            |                  |              |
| CKD                                          | 1.75 (1.30-2.37) | <b>&lt;0.001</b> | 1.32 (1.05-1.87) | <b>0.031</b> |
| AF                                           | 1.48 (1.13-1.93) | <b>0.004</b>     | 1.24 (1.02-1.7)  | <b>0.018</b> |
| Baseline creatinine, mg/dl (1-unit increase) | 1.28 (1.09-1.50) | <b>0.002</b>     | 1.12 (0.91-1.38) | 0.272        |
| Permanent PM or ICD                          | 1.20 (0.81-1.79) | 0.359            |                  |              |
| STS score (1% increase)                      | 1.16 (1.08-1.26) | <b>&lt;0.001</b> | 1.09 (1.02-1.18) | <b>0.011</b> |
| EF (1% increase)                             | 0.99 (0.98-1.00) | 0.229            |                  |              |
| Predilatation                                | 1.06 (0.82-1.39) | 0.648            |                  |              |
| Post-dilatation                              | 1.02 (0.77-1.35) | 0.874            |                  |              |
| Valve size, mm (vs. <23)                     |                  |                  |                  |              |
| 23-26                                        | 0.99 (0.65-1.53) | 0.993            |                  |              |
| ≥27                                          | 1.28 (0.86-1.94) | 0.227            |                  |              |

## References:

1. Laricchia, A.; Cereda, A.; Lucreziotti, S.; Sticchi, A.; Regazzoli, D.; Reimers, B.; Colombo, A.; Latib, A.; Mangieri, A. Expanding Our Horizons for the Use of Transcatheter Self-Expanding Valves: What Does the Future Hold? *Expert Rev. Cardiovasc. Ther.* 2022, 20, 497–501. <https://doi.org/10.1080/14779072.2022.2085688>.
2. Mack, M.J.; Leon, M.B.; Thourani, V.H.; Pibarot, P.; Hahn, R.T.; Genereux, P.; Kodali, S.K.; Kapadia, S.R.; Cohen, D.J.; Pocock, S.J.; et al. Transcatheter Aortic-Valve Replacement in Low-Risk Patients at Five Years. *N. Engl. J. Med.* 2023, 389, 1949–1960. <https://doi.org/10.1056/NEJMOA2307447>.
